# Supplementary material
Source: MDPI journal article supplement (https://www.mdpi.com/2071-1050/15/13/10513)
Supplement: s1 [file s1]

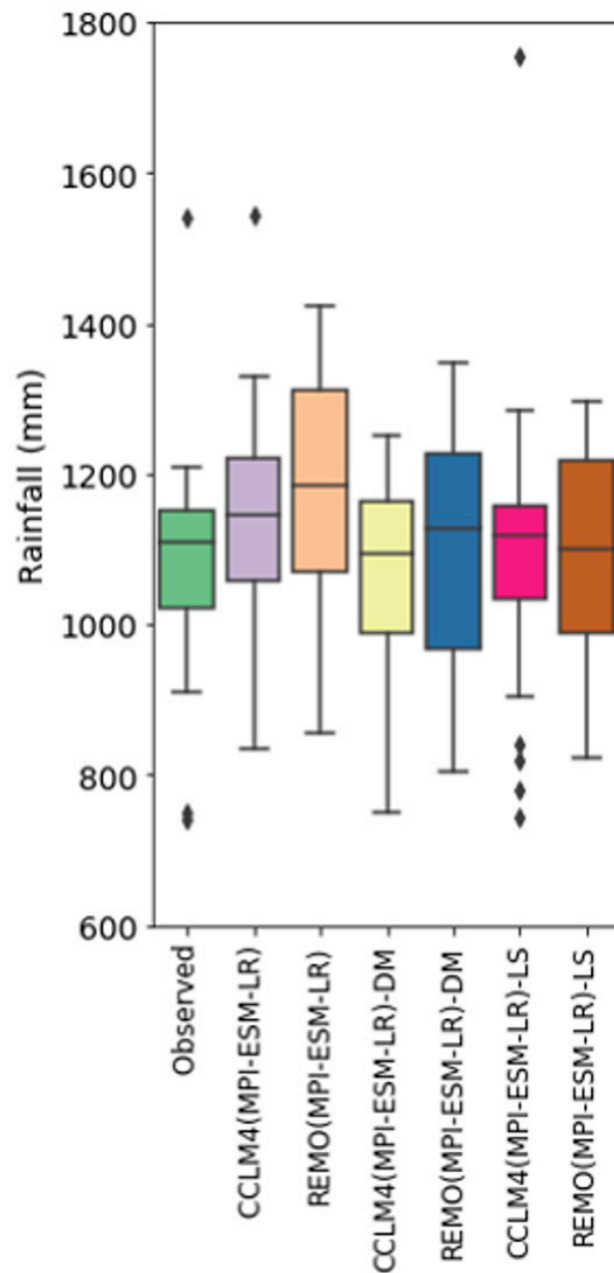

**Supplementary material Figure S1.** boxplots (b) of mean annual rainfall of observed and RCM simulations before and after statistical bias correction in the historical period (1981-2005). The DM and LS represent distribution mapping and linear scaling bias correction methods. In the boxplots, the whiskers indicate the minimum and maximum of rainfall; the horizontal lines represent the 25<sup>th</sup> percentile, the median, and the 75<sup>th</sup> percentile from the bottom to the top of each box plot, and the diamond sign indicates outliers.
